# Supplementary material for: Intrinsic fluorescence hydrogels for ON/OFF screening of antidiabetic drugs: assessing α-glucosidase inhibition by acarbose
Source: Royal Society of Chemistry journal article supplement (doi:10.1039/d4tb02466d), 2025-01-01
Supplement: d4tb02466d1.pdf [file d4tb02466d1.pdf]

Supporting Information

**Intrinsic Fluorescence Hydrogels for ON/OFF Screening of Antidiabetic Drugs: Assessing  $\alpha$ -Glucosidase Inhibition by Acarbose**

F. Javier Patiño<sup>a,b,‡</sup>, Josué M. Galindo<sup>a,b,‡</sup>, Alicia Jiménez<sup>a,b</sup>, Yolanda Alacid<sup>c</sup>, C. Reyes Mateo<sup>c</sup>, Ana M<sup>a</sup> Sánchez-Migallón<sup>a,b</sup>, Ester Vázquez<sup>a,b</sup>, Sonia Merino<sup>a,b,\*</sup>, M. Antonia Herrero<sup>a,b,\*</sup>.

<sup>a</sup>. *Departamento de Química Inorgánica, Orgánica y Bioquímica, Facultad de Ciencias y Tecnologías Químicas, Universidad de Castilla-La Mancha, 13071 Ciudad Real, Spain. Email: [Mariaantonia.herrero@uclm.es](mailto:Mariaantonia.herrero@uclm.es); [sonia.merino@uclm.es](mailto:sonia.merino@uclm.es)*

<sup>b</sup>. *Instituto Regional de Investigación Científica Aplicada (IRICA), UCLM, 13071 Ciudad Real, Spain.*

<sup>c</sup>. *Instituto de Investigación, Desarrollo e Innovación en Biotecnología Sanitaria de Elche (IDiBE), Universidad Miguel Hernández de Elche (UMH), 03202 Elche, Spain.*

‡ F. Javier Patiño and Josué M. Galindo equally contributed to this work.

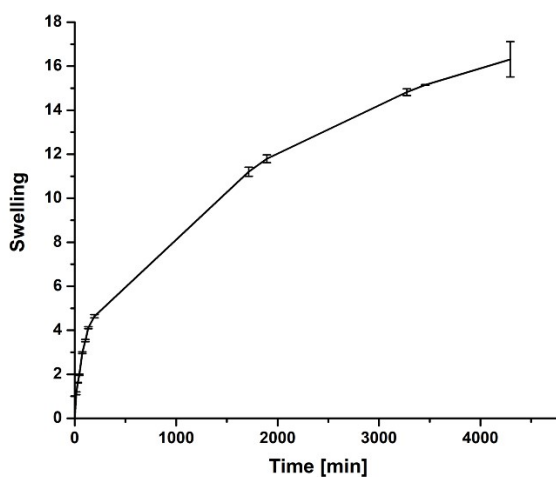

**Fig. S1.** Swelling of ChDAT hydrogel.

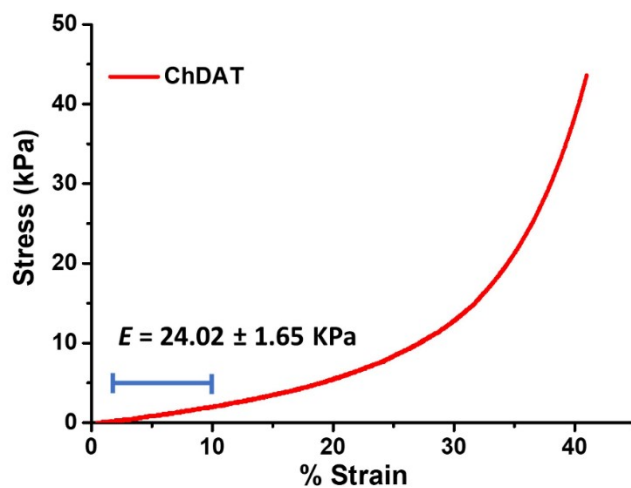

**Fig. S2.** Stress-strain curve and Young's Modulus of ChDAT hydrogel.

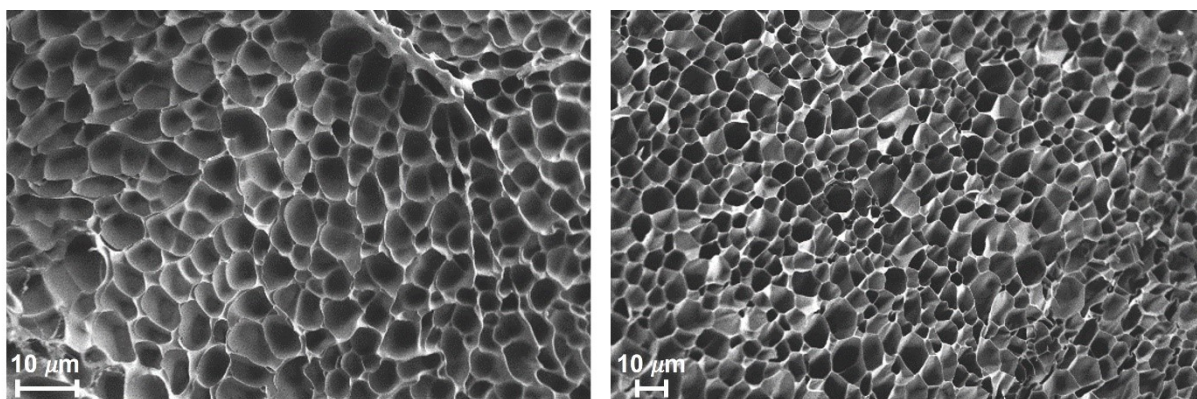

**Fig. S3.** SEM images of ChDAT hydrogels at maximum swelling degree.

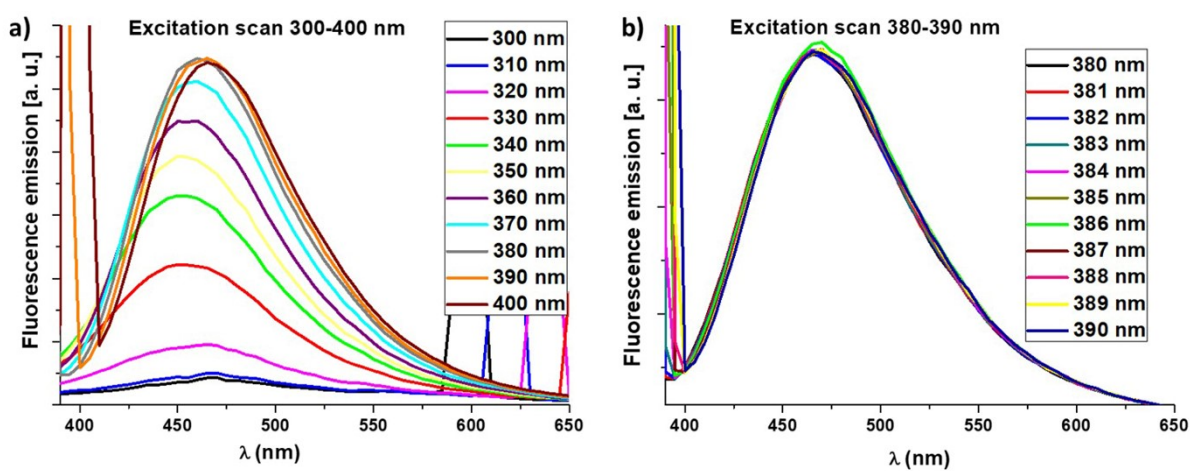

**Fig. S4.** Determination of the optimal excitation wavelength for ChDAT hydrogel. **(a)** Excitation scan conducted from 300 nm to 400 nm, in 10 nm increments. **(b)** Fine excitation scan conducted from 380 nm to 390 nm, in 1 nm increments.

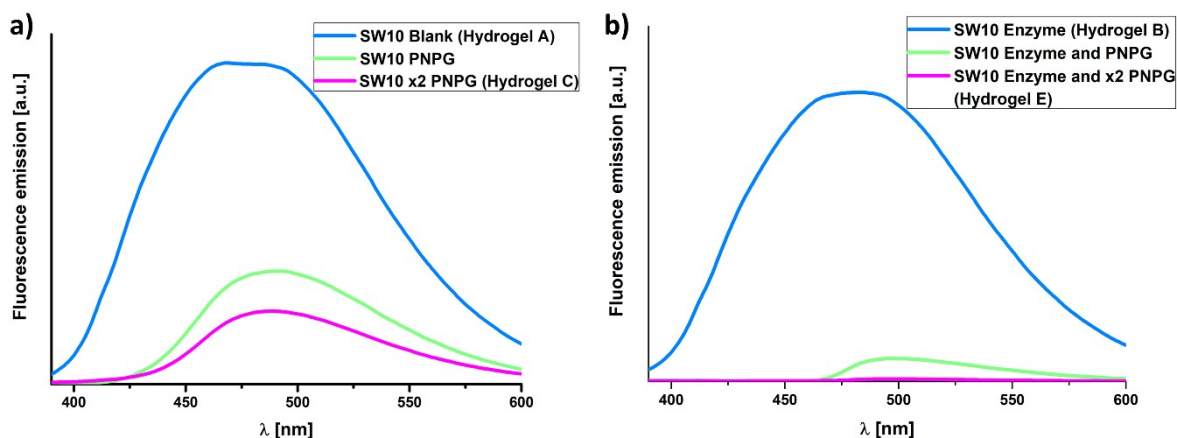

**Fig. S5.** Fluorescence emission of hydrogels at swelling 10 loaded with: **(a)** PNP, **(b)** Enzyme and PNP. The concentration of PNP in green line is  $2.63 \cdot 10^{-3}$  M while the concentration of the pink line is  $5.26 \cdot 10^{-3}$  M.

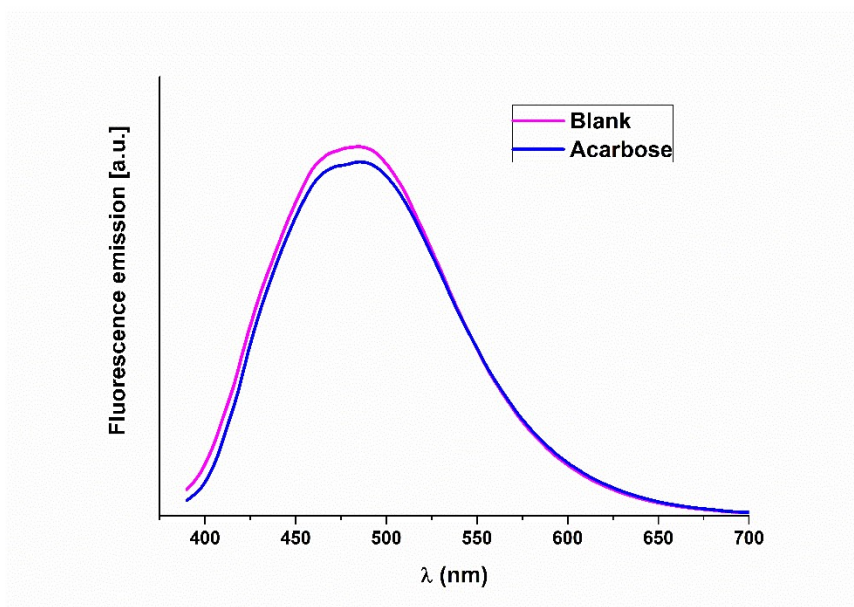

**Fig. S6.** Comparison of the fluorescence emission of the blank and the acarbose loaded hydrogels.
